# Supplementary material for: Evolution of core archetypal phenotypes in progressive high grade serous ovarian cancer
Source: PubMed Central journal article supplement (PMC8144406; doi:10.1038/s41467-021-23171-3), 2021-05-24
Supplement: 41467_2021_23171_MOESM3_ESM.pdf [file 41467_2021_23171_MOESM3_ESM.pdf]

## **Description of Additional Supplementary Files**

File Name: Supplementary Data 1

Description: Longitudinal cohort overall survival

File Name: Supplementary Data 2

Description: Longitudinal cohort treatment history

File Name: Supplementary Data 3

Description: Longitudinal cohort CA-125 levels

File Name: Supplementary Data 4

Description: Validation cohort treatment history

File Name: Supplementary Data 5

Description: Linear regression analysis of KEGG pathways against archetype scores

File Name: Supplementary Data 6

Description: Proportions of archetype specialists

File Name: Supplementary Data 7

Description: Summary of WGS analysis

File Name: Supplementary Data 8

Description: WGS Germline Variants

File Name: Supplementary Data 9

Description: High impact somatic variants

File Name: Supplementary Data 10

Description: WGS copy number estimates (z-transformed)

File Name: Supplementary Data 11

Description: WGS genic structural variants
